# Supplementary material for: Linguistic fairness in the U.S.: The case of multilingual public health information about COVID-19
Source: bioRxiv or medRxiv preprint supplement (doi:10.1101/2021.09.27.21264211), 2021-09-29
Supplement: Supplementary file [file media-1.pdf]

1

## 2 **Supplementary Appendix for**

### 3 **Linguistic fairness in the U.S.: The case of multilingual public health information about** 4 **COVID-19**

5 **Damián E. Blasi, Vishala Mishra, Adolfo M. García, and Joseph P. Dexter**

6 **Corresponding authors: Damián E. Blasi, Vishala Mishra, Joseph P. Dexter**

7 **E-mail: [dblasi@fas.harvard.edu](mailto:dblasi@fas.harvard.edu), [mishra.vishala@gmail.com](mailto:mishra.vishala@gmail.com), [jdexter@fas.harvard.edu](mailto:jdexter@fas.harvard.edu)**

#### 8 **This PDF file includes:**

9 Table S1

| Label           | Languages                                                           | Description            |
|-----------------|---------------------------------------------------------------------|------------------------|
| Guajarati       | Gujurati   Gujarati                                                 | Spelling normalization |
| Samoan          | Somoan   Samoan                                                     | Spelling normalization |
| Laotian         | Lao   Laotian                                                       | Spelling normalization |
| Punjabi         | Punjabi   Panjabi                                                   | Spelling normalization |
| Khmer           | Khmer   Mon-Khmer, Cambodian                                        | Spelling normalization |
| Punjabi         | Punjabi   Panjabi                                                   | Spelling normalization |
| Purepecha       | Purepecha   Tarascan                                                | Alternative names      |
| Serbo-Croatian* | Serbian   Croatian   Bosnian   Serbocroatian                        | Generalization         |
| Mayan*          | K'iche   Q'anjobal   Mam   Mayan   Chuj   Akateko   Mayan Languages | Generalization         |
| Cushitic*       | Cushite   Somali   Oromo   Maay Maay                                | Generalization         |
| Chamic*         | Cham   Rhade   Jarai                                                | Generalization         |
| Persian*        | Farsi   Persian   Dari                                              | Generalization         |
| Chinese*        | Chinese   Mandarin   Cantonese                                      | Generalization         |
| Micronesian*    | Micronesian   Pohnpeian   Kosraean   Chuukese                       | Generalization         |
| Bantu*          | Kirundi   Lingala   Bantu   Kinyarwanda   Kinyamulenge              | Generalization         |
| Karen*          | Karen   Kayah                                                       | Generalization         |
| Tibetan*        | Tibetan   Bhantinese                                                | Generalization         |
| Oto-Manguean*   | Mixteco   Zapoteco del Istmo   Oto-Manguen                          | Generalization         |
| Sudanic*        | Dinka   Nuer   Sudanic                                              | Generalization         |
| French Creole*  | Haitian Creole   French Creole                                      | Generalization         |

**Table S1. Language and language group labels used in the analysis.** “Label” is the summary term for the related languages, language names, and language varieties we aggregated, which are listed under “Languages”. The “Description” column summarizes the nature of the normalization process. “Spelling normalization” and “Alternative names” refer to standardization of orthography and nomenclature, respectively; “Generalization” refers to cases in which it was necessary due to incomplete information to identify the most proximate common linguistic denominator across databases.
